# Supplementary material for: Chromatin loop dynamics during cellular differentiation are associated with changes to both anchor and internal regulatory features
Source: PubMed Central journal article supplement — Genome Res. 2023 Aug;33(8):1258–68. doi: 10.1101/gr.277397.122 (PMC10547260; doi:10.1101/gr.277397.122), 2023-08
Supplement: supplemental_figures.pdf [file supplemental_figures.pdf]

## Sup Fig S1

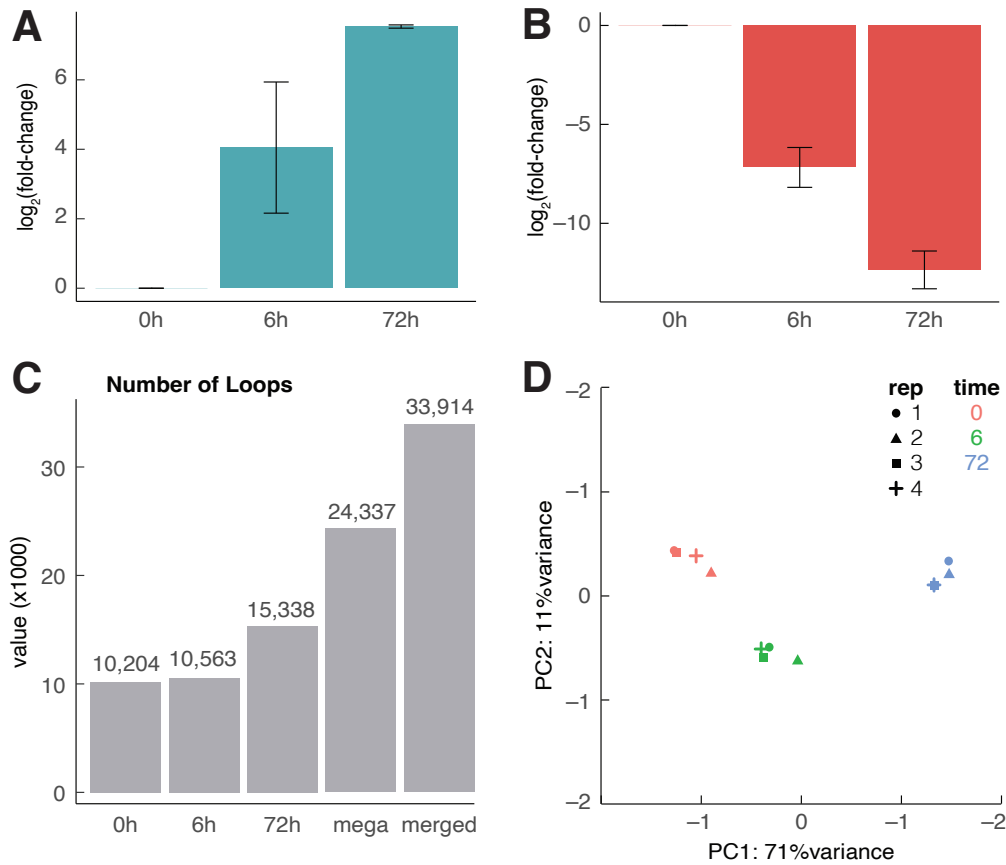

**Figure S1. Confirmation of megakaryocyte differentiation and detection of loops.** qPCR analysis of **(A)** *ITGB3* and **(B)** *KLF1* over megakaryocyte differentiation at 0, 6, and 72h. Two biological replicates and 4 technical replicates were collected, normalized to *GAPDH* levels, and  $\log_2(\text{fold-change})$  was calculated relative to 0h. **(C)** Number of loops identified with SIP after 0, 6, or 72h of differentiation, after merging all timepoints together into the Mega map, and merging all timepoints together with mariner. **(D)** PCA plot showing similarities in loop counts between replicates and timepoints.

Sup Fig S2

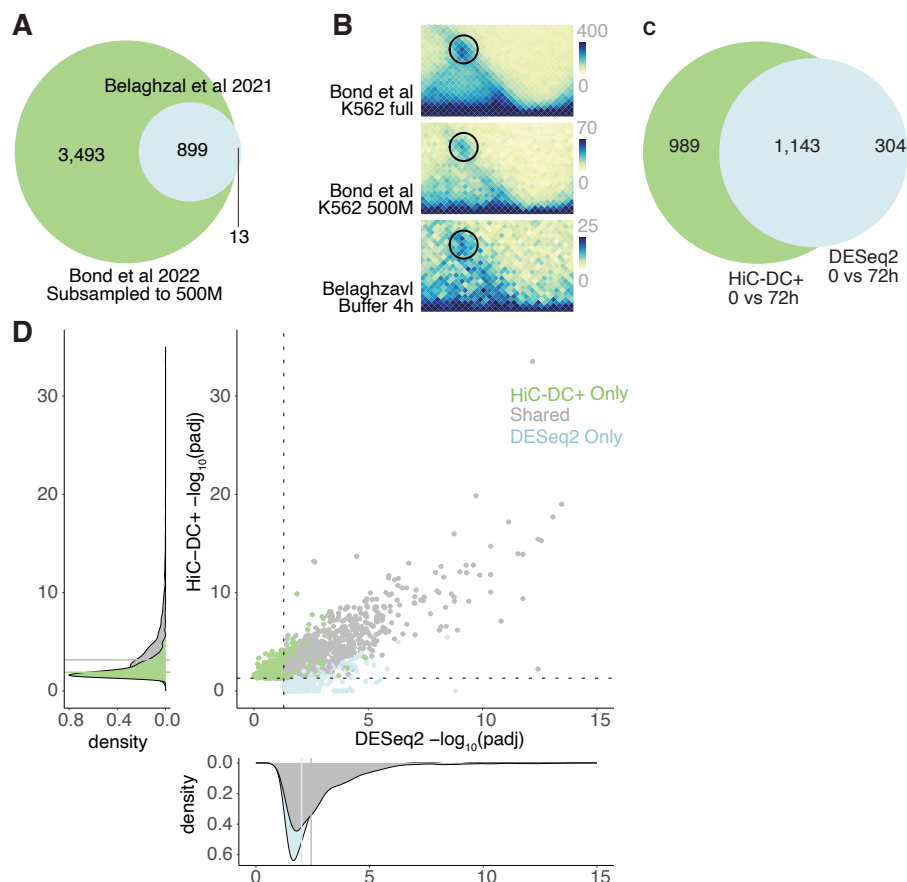

**Figure S2. Loops are similar to previous studies and other differential looping strategies.**

**(A)** Venn diagram comparing loops from K562s in this study subsampled to 500 million reads to loops from Belaghzal et al 2021. **(B)** Representative loop for full K562 data from this study (top) the data subsampled to 500M reads (middle), and Belaghzal et al (bottom). **(C)** Venn diagram comparing the differential loops identified in this study by DESeq2 (0 vs 72h) and differential loops identified from HiC-DC+ (0 vs 72h). **(D)** Scatter plot comparing adjusted p-values for DESeq2 (0 vs 72h) to adjusted p-values for HiC-DC+ (0 vs 72h). The y-axis includes a density plot showing the differences in distributions of the HiC-DC+ specific differential loops to the shared differential loops between both loop callers. The x-axis includes a density plot showing the differences in distributions of the DESeq2 specific differential loops to the shared differential loops between both loop callers. Gray lines on the density plots represent the median of the shared loop distribution (3.16 on the y-axis and 2.42 on the x-axis), green line represents the median of the HiC-DC+ only distribution (1.9), blue line represents the median of the DESeq2 only distribution (2.01).

Sup Fig S3

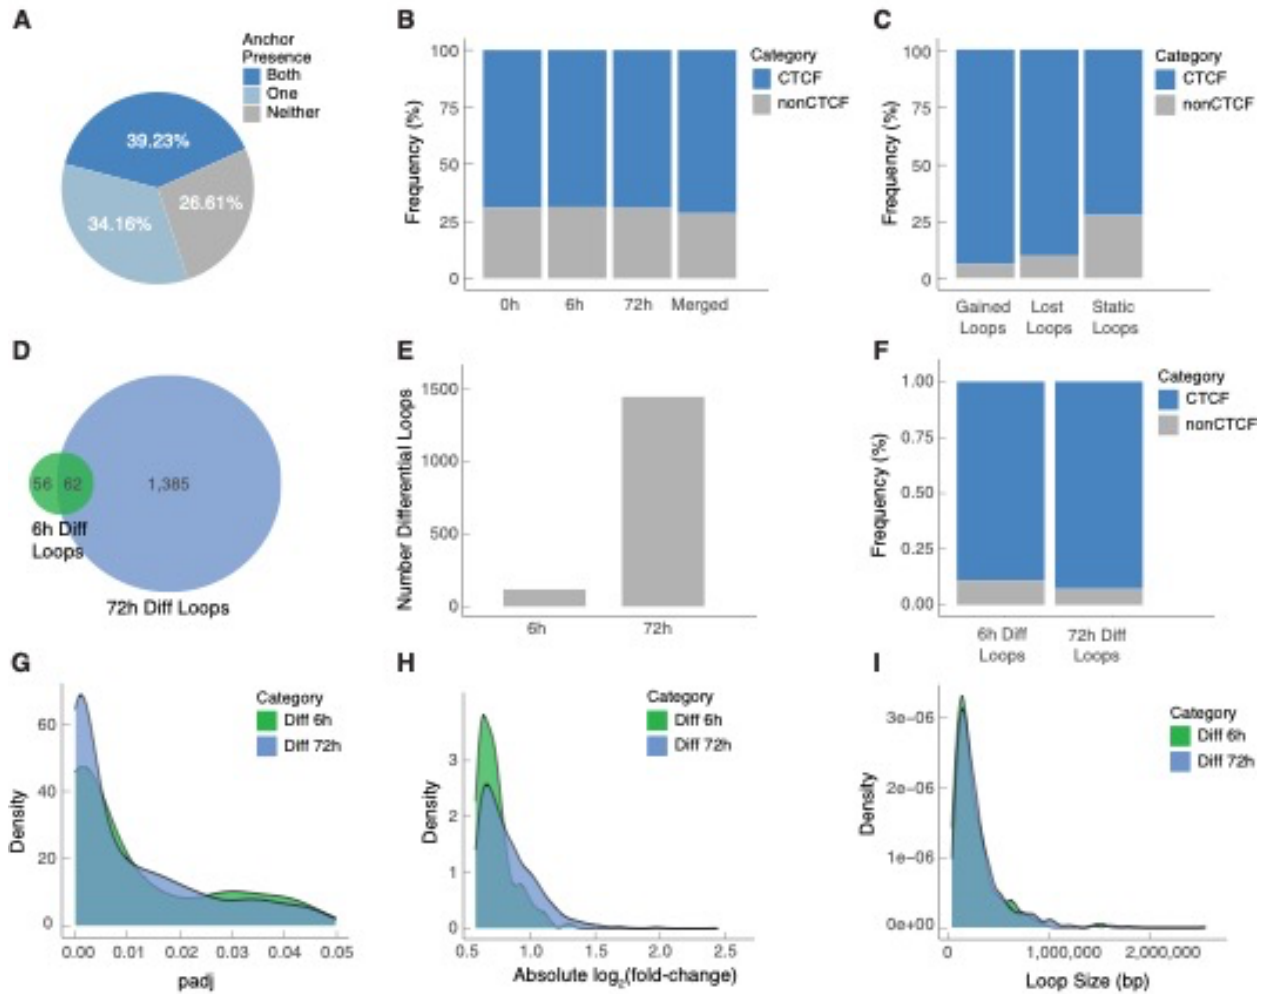

**Figure S3. CTCF is bound at a majority of loops and there are minimal differences between differential loops after 6h and 72h.** (A) Pie chart showing percentage of loops that have CTCF at both anchors, one anchor, or neither anchor. (B) Proportion of CTCF and non-CTCF bound loops at each time point, and the merged map. (C) Proportion of CTCF and non-CTCF bound loops for gained, lost, and static loops. (D) Venn diagram comparing differential loops at 6h and 72h. (E) Number of differential loops identified at 6h and 72h. (F) Proportion of CTCF and non-CTCF bound loops for differential loops at 6h and 72h. (G) Distribution of adjusted p values for differential loops at 6h and 72h. (H) Distribution of  $\log_2(\text{fold-changes})$  for differential loops at 6h and 72h. (I) Distribution of loop sizes for differential loops at 6h and 72h.

Sup Fig S4

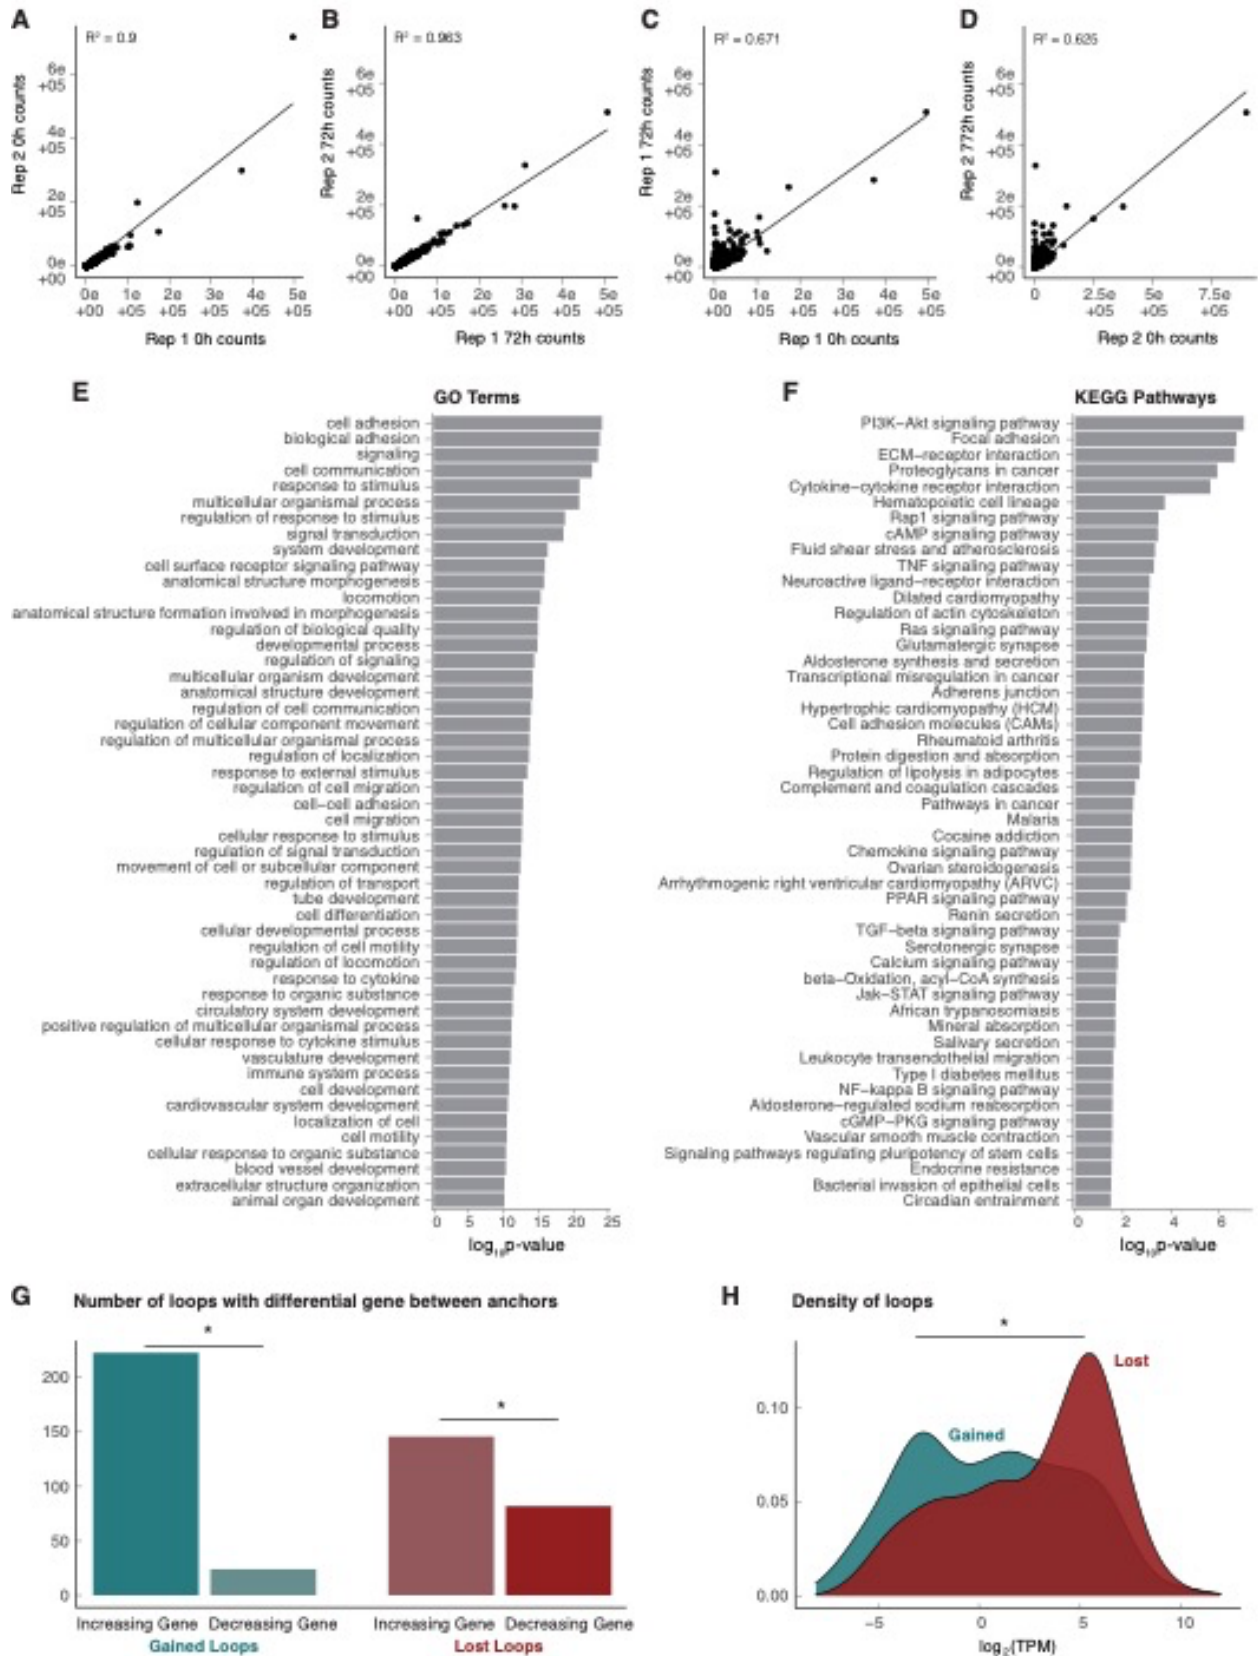

**Figure S4. Replicate correlations, megakaryocyte pathway enrichment, and interior gene expression.** Scatterplots showing the correlation between gene counts from **(A)** Rep 1 0h and Rep 2 0h, **(B)** Rep 1 72h and Rep 2 72h, **(C)** Rep 1 0h and Rep 1 72h, and **(D)** Rep 2 0h and Rep 2 72h (fourth). **(E)** Top 50 GO terms for up-regulated genes from RNA-seq. **(F)** Top 50 KEGG Pathways for up-regulated genes from RNA-seq. **(G)** Concordance analysis for the 475 differential loops that had a differential gene promoter between their anchors. Binomial test performed for each comparison, asterisks represent  $p < 0.05$ . **(H)** Expression of genes located between the anchors of gained and lost loops, asterisk represents  $p < 0.05$  (TPM: transcripts per million).

Sup Fig S5

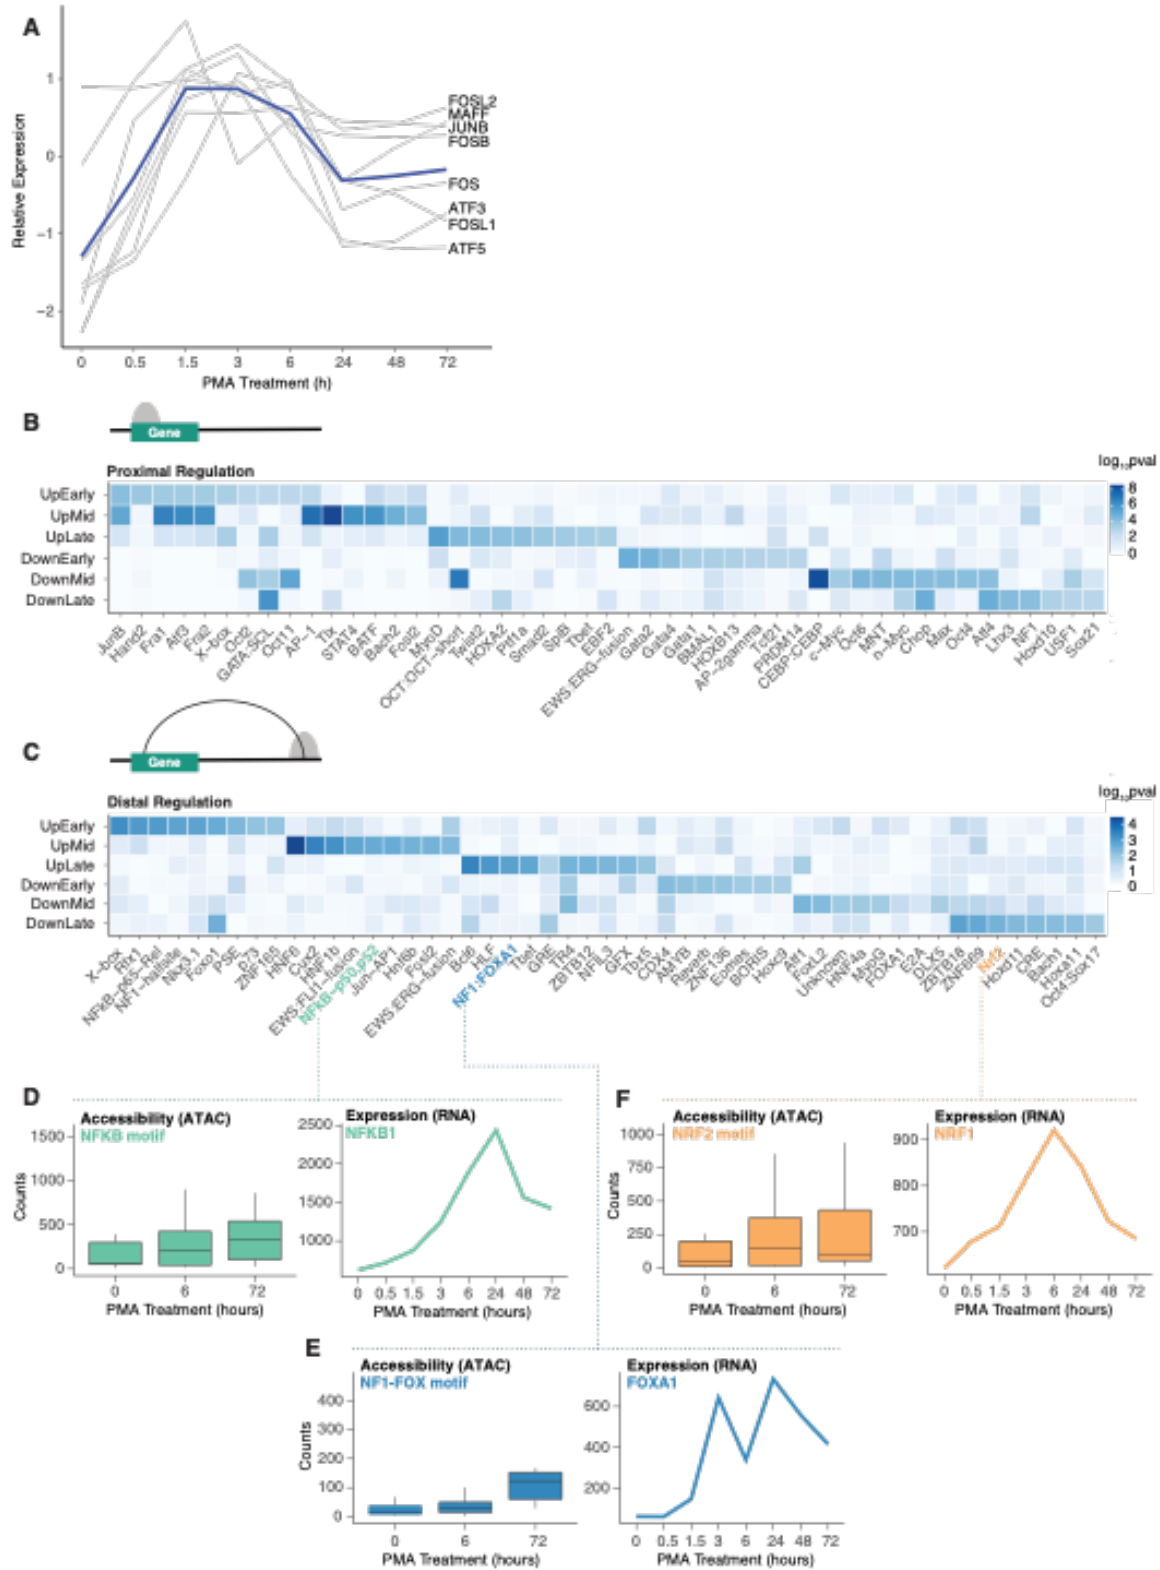

**Figure S5. AP-1 members are expressed and different sets of transcription factors are enriched at proximal and distal anchors of differential genes at loops. (A)** Normalized expression of various differential expressed AP-1 family members (blue = median expression). **(B)** TFs enriched at the promoters of looped differential genes in each cluster. **(C)** TFs enriched at the distal anchors of looped differential genes in each cluster. **(D)** Chromatin accessibility of NF $\kappa$ B motifs over time (left) and gene expression of *NFKB1* (right). **(E)** Chromatin accessibility of NF1-FOX motif over time (left) and expression of *FOXA1* (right). **(F)** Chromatin accessibility of NRF2 motif over time (left) and expression of *NRF1* (right).

Sup Fig S6

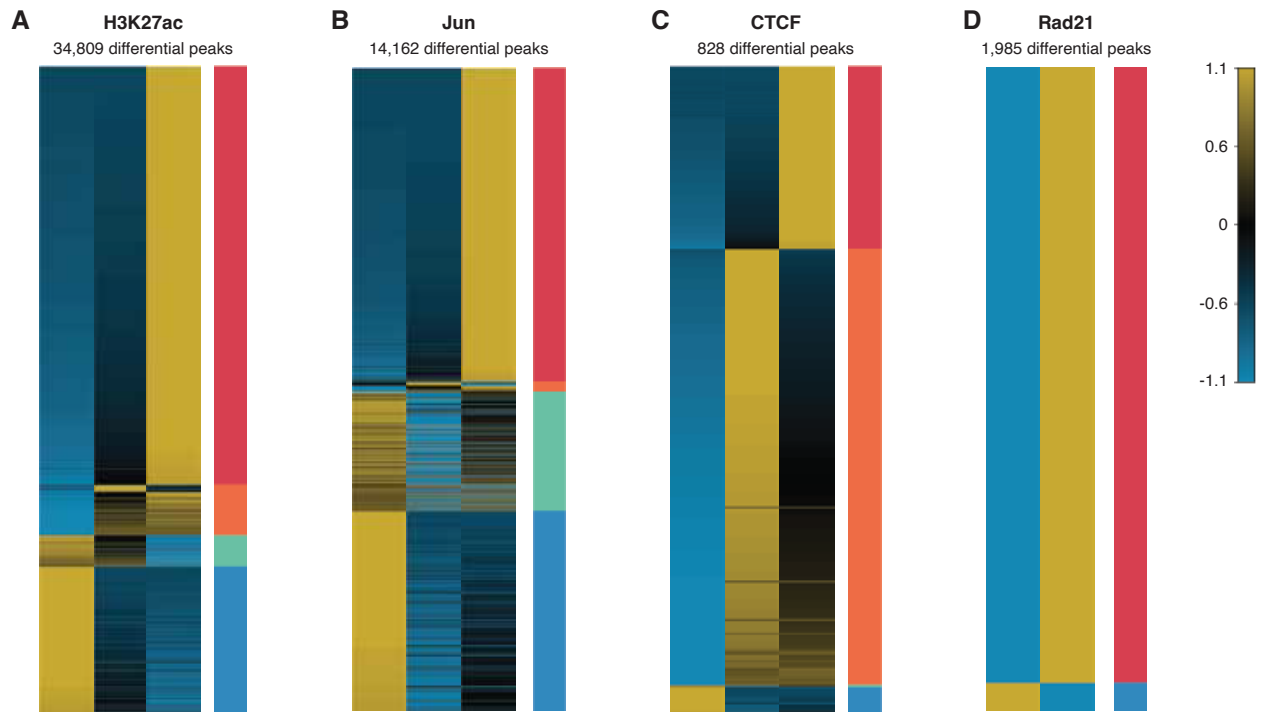

**Figure S6. Differential chromatin and transcription factor binding events.** Heatmaps showing normalized counts for **(A)** H3K27ac, **(B)** JUN, **(C)** CTCF, and **(D)** RAD21. Clusters are indicated by the bars on the right side of each heatmap,  $p < 0.05$ ,  $\log_2(\text{fold-change}) > 2$ .



Sup Fig S7

**A**

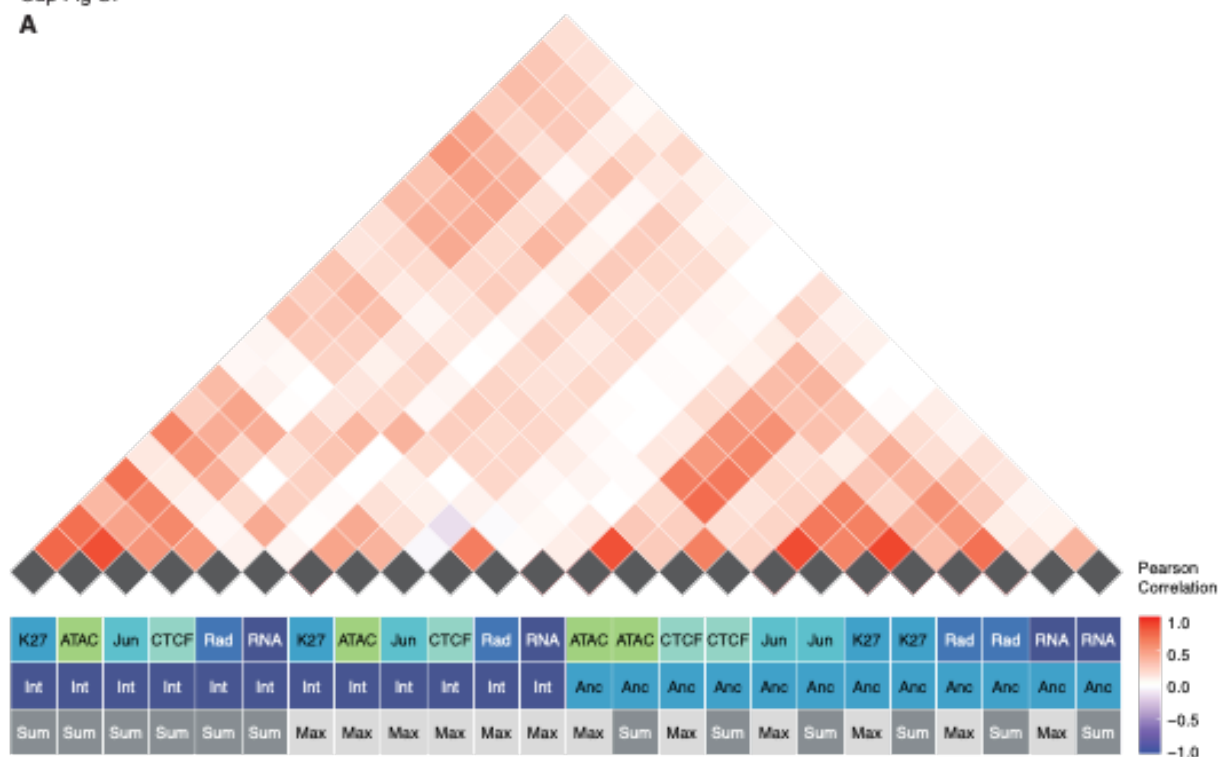

**B** CTCF Loops

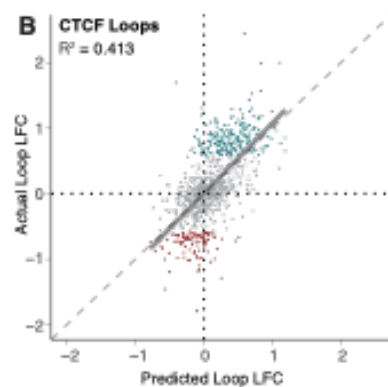

**C** Non-CTCF Loops

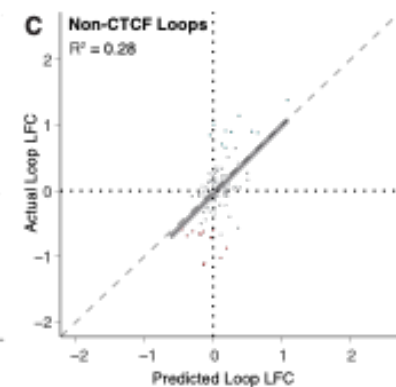

**D** Random Forest

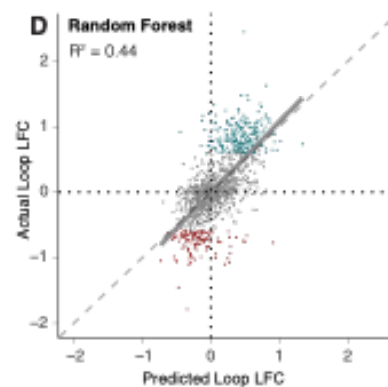

**E**

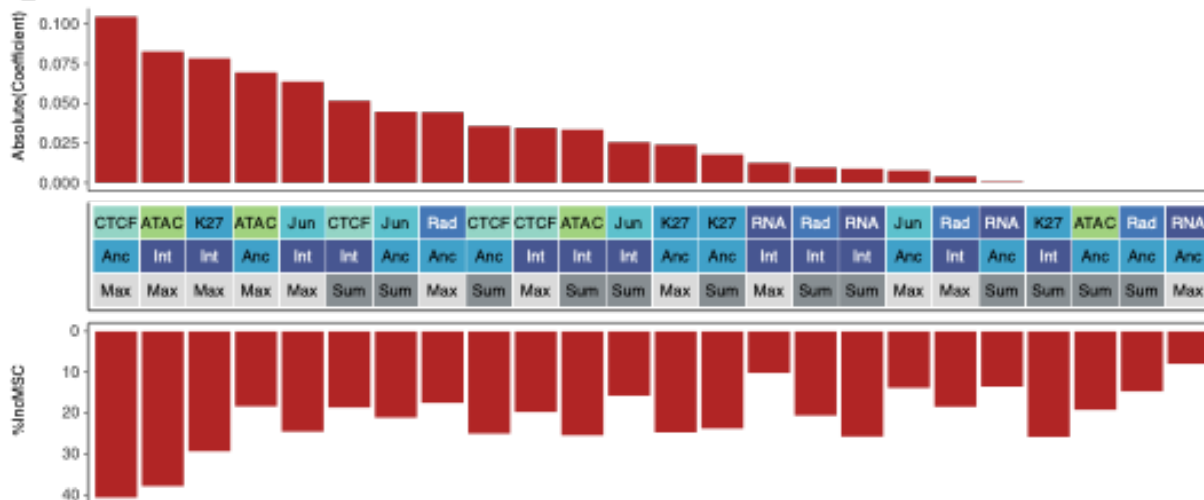

**Figure S7. Correlation of genomic features.** **(A)** Correlation heatmap showing the individual correlations of each of the features (top) and legend representing which feature is represented (bottom). Scatterplot showing the predicted loop fold-change vs actual loop fold-change for the testing dataset for **(B)** CTCF loops, **(C)** non-CTCF loops, and **(D)** all loops with random forest regression. (Gray = static loops, teal = gained loops, maroon = lost loops,  $R^2$  calculated for all loops included in the testing dataset). **(E)** Individual feature absolute coefficients from the linear model including all features, ordered by decreasing absolute coefficients (top). Legend representing which feature is represented in the barplots (middle). Percent Included Mean Squared Error (%IncMSE) for all of the features included in the random forest model, in the same order as the features from the linear model (bottom).

Sup Fig S8

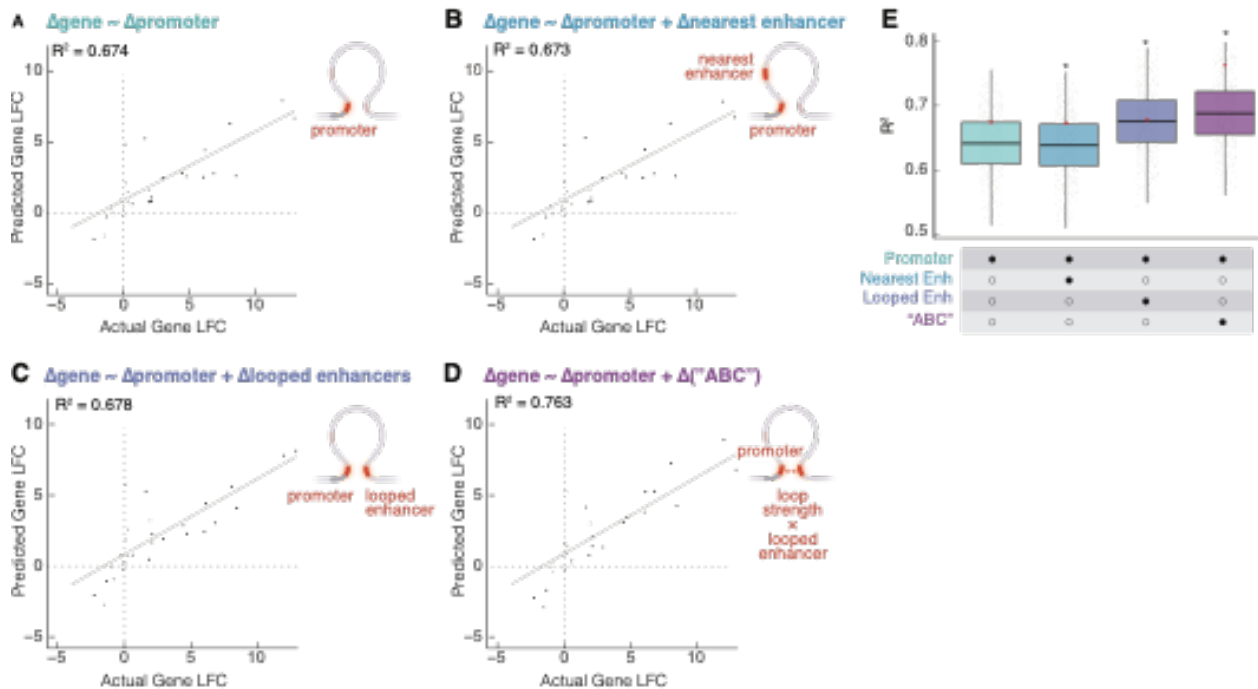

**Figure S8. Changes in gene expression at differential loops are explained by combined proximal and distal enhancer activity and loop strength.** Scatter plots showing predicted gene-fold change vs actual gene fold-change for genes that are at the anchors of differential loops based on one permutation of **(A)** promoter H3K27ac LFC alone, **(B)** promoter H3K27ac LFC and the nearest enhancer to the promoter's FC, **(C)** promoter H3K27ac FC and distal looped H3K27ac, and **(D)** promoter H3K27ac LFC and the LFC of the product of distal looped H3K27ac and loop strength (red = differential gene, gray = static gene). **(E)**  $R^2$  for each model calculated based on 1000 permutations of splitting data into training and testing sets. Wilcoxon rank sum test was performed to compare each group to the promoter only model, asterisk represents  $p < 0.05$ . Red dots represent the single permutation from A-D.
